# Supplementary material
Source: HighWire-hosted journal article supplement (https://ejhp.bmj.com/highwire/filestream/153729/field_highwire_adjunct_files/1/ejhpharm-2022-003648supp002_data_supplement.pdf)
Supplement: ejhpharm-2022-003648supp002_data_supplement.pdf [file ejhpharm-2022-003648supp002_data_supplement.pdf]

## Appendix 2. Level 2 assessment for modules 1 and 2.

- 
1. What is the recommended time, in seconds, for hygienic handwashing?
    - A. 10–30
    - B. 30–60
    - C. 60–90
    - D. 90–120
  
  2. What is the recommended time, in seconds, for hand disinfection?
    - A. 10–20
    - B. 20–30
    - C. 30–40
    - D. 40–50
  
  3. In a cleanroom, what is the minimum recommended time interval between glove disinfections when under laminar flow?
    - A. Every 5 minutes
    - B. Every 10 minutes
    - C. Every 15 minutes
    - D. Every 20 minutes
  
  4. Which step is part of the handwashing procedure?
    - A. Rub thumbs circularly
    - B. Rub back of the hands
    - C. Rub the forearms
    - D. All the above answers
  
  5. What is the easiest way to destroy bacteria on your hands?
    - A. Handwashing with water and soap
    - B. Handwashing with water
    - C. Using a handrub with hydroalcoholic solution
    - D. Using a handrub with chlorhexidine solution
-

- 
6. What is the recommendation for drying hands after washing them?
- A. Drying by rubbing
  - B. Drying in air
  - C. Drying with a hand towel
  - D. Drying by tapping
7. Why cannot we use a hydroalcoholic solution to disinfect gloves?
- A. The quantity of alcohol in the solution is too low
  - B. The emollient agent included in the solution makes gloves permeable
  - C. The hydrogen peroxide in the solution is corrosive to gloves
  - D. None of the above answers: hydroalcoholic solution can be used to disinfect gloves
8. Why should hands be completely dry when applying hand disinfectant?
- A. To lower the risk of alcohol dilution
  - B. To lower the risk of skin irritation
  - C. To lower the risk of forgetting some parts of the hands
  - D. To lower the risk of contamination from bacteria in water
9. What is chlorhexidine's role in disinfecting the gloves?
- A. It accelerates the drying of the product
  - B. It has a virucidal action
  - C. It lengthens the bactericidal action of alcohol
  - D. It creates a protective film on the hands
-
